# Supplementary material for: A Bi-layer TiO2 photoanode for highly durable, flexible dye-sensitized solar cells
Source: Royal Society of Chemistry journal article supplement (doi:10.1039/c4ta06656a), 2015-01-01
Supplement: c4ta06656a1.pdf [file c4ta06656a1.pdf]

# Supporting Information

## A Bi-layer TiO<sub>2</sub> Photoanode for Highly Durable, Flexible Dye-sensitized Solar Cells

Jianjian Lin,<sup>a</sup> Yong Peng,<sup>b</sup> Alexander R. Pascoe,<sup>b</sup> Fuzhi Huang,<sup>b</sup> Yi-Bing Cheng,<sup>\*b</sup>  
Yoon-Uk Heo,<sup>c</sup> Andrew Nattestad,<sup>\*d</sup> Wanchul Seung,<sup>e</sup> Sung Kyun Kim,<sup>e</sup> Hoon Joon  
Yoon,<sup>e</sup> Sang-Woo Kim,<sup>e</sup> Yusuke Yamauchi,<sup>f</sup> Shi Xue Dou,<sup>a</sup> and Jung Ho Kim<sup>\*a</sup>

<sup>a</sup>*Institute for Superconducting and Electronic Materials (ISEM), Australian Institute for Innovative Materials (AIIM),  
University of Wollongong, NSW 2522, Australia. E-mail: [jhk@uow.edu.au](mailto:jhk@uow.edu.au)*

<sup>b</sup>*Department of Materials Engineering, Monash University, Melbourne, Victoria 3800, Australia. E-mail:  
[yibing.cheng@monash.edu](mailto:yibing.cheng@monash.edu)*

<sup>c</sup>*Graduate Institute of Ferrous Technology, Pohang University of Science and Technology, San 31, Hyoja-Dong, Pohang 790-  
784, Republic of Korea*

<sup>d</sup>*Intelligent Polymer Research Institute (IPRI), ARC Centre of Excellence for Electromaterials Science, AIIM,  
University of Wollongong, NSW 2522, Australia. E-mail: [anattest@uow.edu.au](mailto:anattest@uow.edu.au)*

<sup>e</sup>*School of Advanced Materials Science and Engineering, Sungkyunkwan University (SKKU), Suwon 440-746, Republic of Korea.*

<sup>f</sup>*World Premier International (WPI) Research Center for Materials Nanoarchitectonics (MANA), National Institute for Materials  
Science (NIMS), 1-1 Namiki, Tsukuba, Ibaraki 305-0044, Japan.*

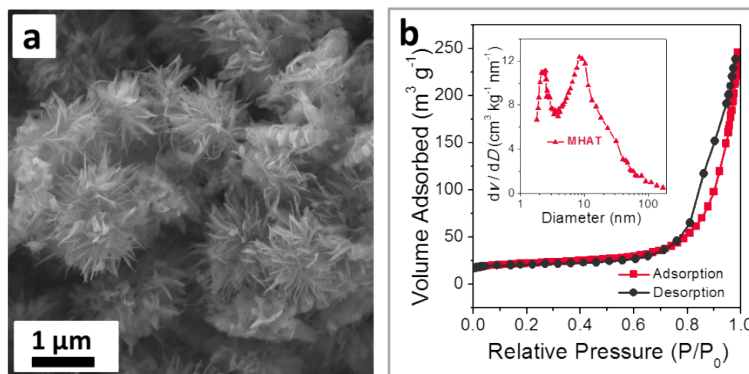

**Figure S1.** (a) Low magnification FE-SEM image of mesoporous hierarchical anatase TiO<sub>2</sub> (MHAT); (b) N<sub>2</sub> adsorption-desorption isotherm, with the inset image showing the pore size distribution calculated from the adsorption branch of a nitrogen isotherm by the Barrett-Joyner-Halenda (BJH) method.

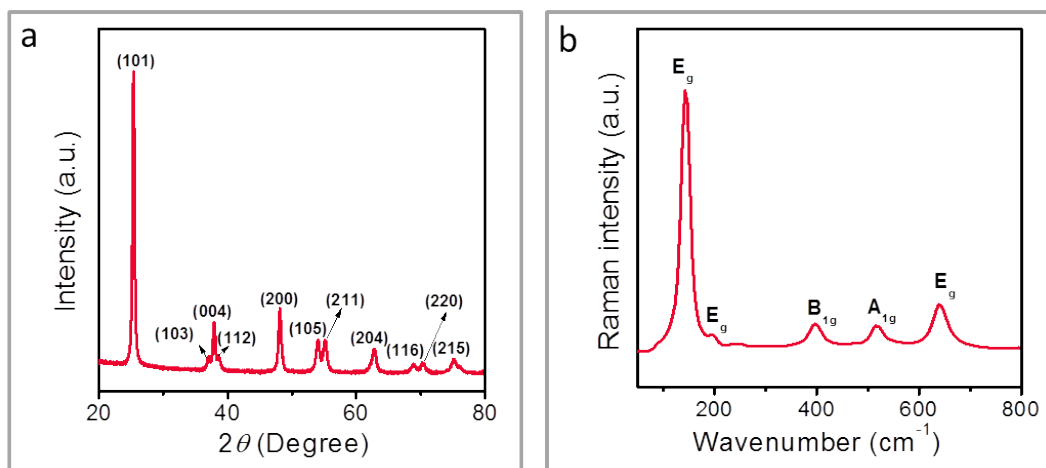

**Figure S2.** a) XRD pattern of the MHAT, indicating that the spheres are anatase  $\text{TiO}_2$  phase (JCPDS No. 21-1272,  $a = 3.785 \text{ \AA}$ ,  $b = 3.785 \text{ \AA}$ ,  $c = 9.514 \text{ \AA}$ ); b) Raman spectrum of the MHAT, confirming the anatase phase from the characteristic Raman modes at  $142.1 \text{ cm}^{-1}$  ( $E_g$ ),  $194.5 \text{ cm}^{-1}$  ( $E_g$ ),  $396.1 \text{ cm}^{-1}$  ( $B_{1g}$ ),  $515.8 \text{ cm}^{-1}$  ( $A_{1g}$ ), and  $638.4 \text{ cm}^{-1}$  ( $E_g$ ), which can be assigned to the Raman active modes ( $A_{1g}+B_{1g}+3E_g$ ) of anatase.

**Table S1.** Photovoltaic characteristics of the DSCs made from P25 and MHAT films with different thicknesses pressed under different applied pressure.

| Samples | Pressure (MPa) | Thickness ( $\mu\text{m}$ ) | $J_{sc}$ ( $\text{mA cm}^{-2}$ ) | $V_{oc}$ (mV) | $FF$ (%) | $\eta$ (%) |
|---------|----------------|-----------------------------|----------------------------------|---------------|----------|------------|
| P25     | 50             | 6                           | 5.84                             | 695           | 58.7     | 2.39       |
| P25     | 100            | 6                           | 5.96                             | 681           | 59.8     | 2.43       |
| P25     | 150            | 6                           | 7.25                             | 666           | 65.2     | 3.15       |
| P25     | 200            | 6                           | 7.47                             | 678           | 65.5     | 3.32       |
| P25     | 50             | 12                          | 7.02                             | 692           | 65.7     | 3.19       |
| P25     | 100            | 12                          | 7.15                             | 742           | 67.1     | 3.56       |
| P25     | 150            | 12                          | 8.38                             | 741           | 65.4     | 4.06       |
| P25     | 200            | 12                          | 9.76                             | 718           | 64.3     | 4.50       |
| MHAT    | 50             | 6                           | 6.52                             | 716           | 69.0     | 3.22       |
| MHAT    | 100            | 6                           | 6.56                             | 731           | 70.7     | 3.39       |
| MHAT    | 150            | 6                           | 6.97                             | 732           | 69.2     | 3.53       |
| MHAT    | 200            | 6                           | 7.23                             | 751           | 72.3     | 3.92       |
| MHAT    | 50             | 12                          | 7.24                             | 722           | 68.7     | 3.59       |
| MHAT    | 100            | 12                          | 8.00                             | 740           | 71.2     | 4.22       |
| MHAT    | 150            | 12                          | 9.20                             | 720           | 66.6     | 4.41       |
| MHAT    | 200            | 12                          | 10.90                            | 719           | 67.3     | 5.30       |

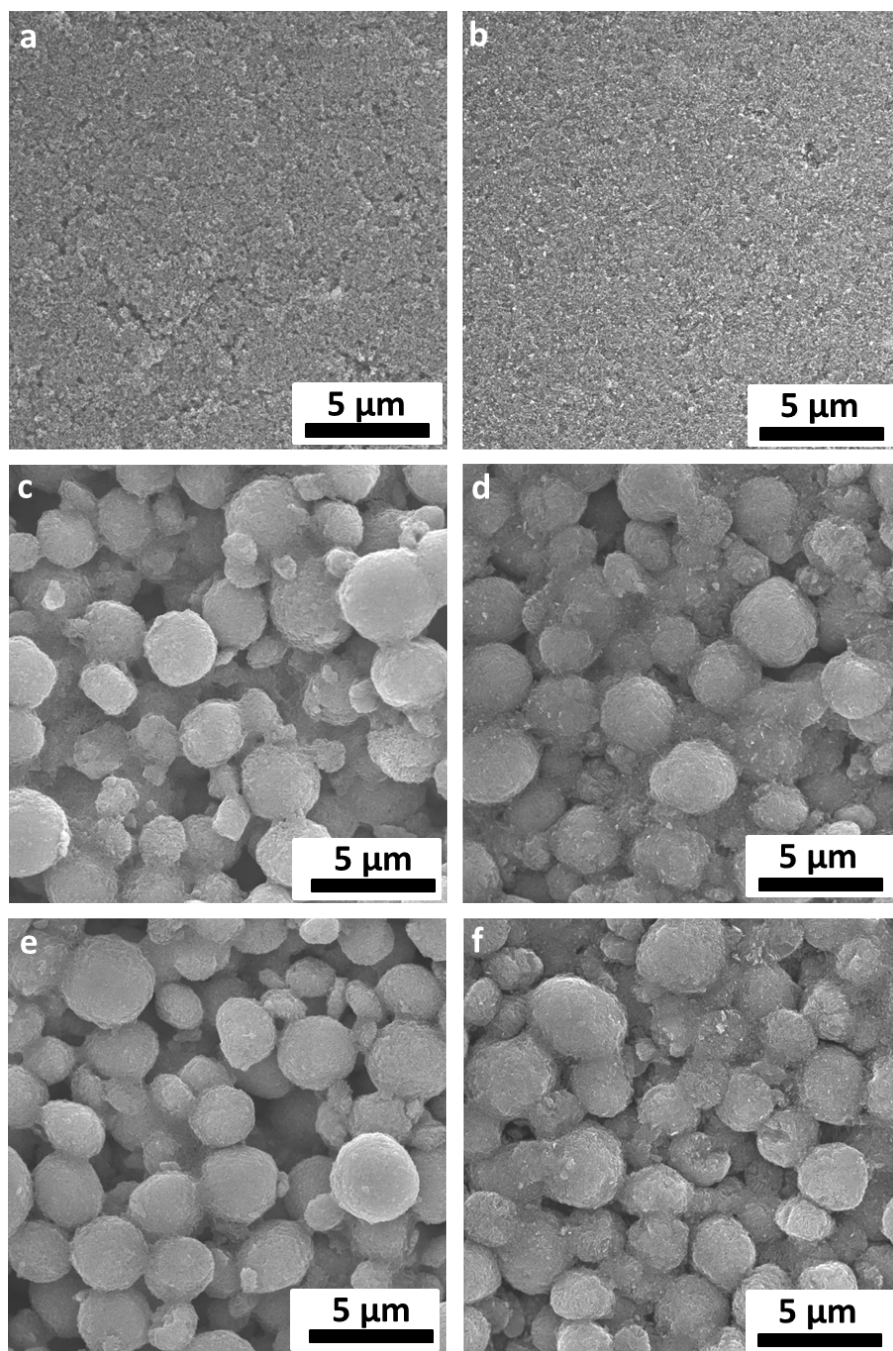

**Figure S3.** FE-SEM images of different TiO<sub>2</sub> films on ITO/PEN substrate: P25 film (a) before and (b) after CIP; MHAT film (c) before and (d) after CIP; P25/MHAT film (e) before and (f) after CIP.

**Table S2.** Photovoltaic parameters of DSCs on flexible ITO/PEN substrates based on a MHAT film layer over a P25 under layer (P25/MHAT) before CIP and after CIP (200 MPa), which were measured under air mass (AM) 1.5 global (1.5G) one sun illumination ( $100 \text{ mW cm}^{-2}$ ).  $J_{sc}$ : short-circuit photocurrent density;  $V_{oc}$ : open-circuit photovoltage;  $FF$ : fill factor;  $\eta$ : total power conversion efficiency. The active areas were  $\sim 0.16 \text{ cm}^2$  for all of the cells (with the mask area  $0.16 \text{ cm}^2$ ), and the data presented are the average value obtained after testing four cells and finding the standard deviation thereof.

| Sample                 | $J_{sc}$<br>[mA cm <sup>-2</sup> ] | $V_{oc}$<br>[mV] | $FF$<br>[%] | $\eta$<br>[%] | Thickness <sup>a)</sup><br>[ $\mu\text{m}$ ] |
|------------------------|------------------------------------|------------------|-------------|---------------|----------------------------------------------|
| P25/MHAT<br>before CIP | $8.6 \pm 0.3$                      | $727 \pm 5$      | $64 \pm 2$  | $4.0 \pm 0.2$ | $12 \pm 2$                                   |
| P25/MHAT<br>after CIP  | $11.7 \pm 0.3$                     | $733 \pm 5$      | $65 \pm 2$  | $5.6 \pm 0.2$ | $12 \pm 2$                                   |

<sup>a)</sup> Measurement of film thickness was carried out on a surface profile system (Veeco Dektak 150).

**Table S3.** Photovoltaic parameters of DSCs on flexible ITO/PEN substrates based on a MHAT film layer over a P25 under layer [P25/MHAT ~ 16  $\mu\text{m}$  (12 $\mu\text{m}$  P25+ 4 $\mu\text{m}$  MHAT)], which were measured under air mass (AM) 1.5 global (1.5G) one sun illumination (100  $\text{mW cm}^{-2}$ ).  $J_{\text{sc}}$ : short-circuit photocurrent density;  $V_{\text{oc}}$ : open-circuit photovoltage;  $FF$ : fill factor;  $\eta$ : total power conversion efficiency. The active areas were ~ 0.16  $\text{cm}^2$  for all of the cells (with the mask area 0.16  $\text{cm}^2$ ), and the data presented are the average value obtained after testing four cells and finding the standard deviation thereof.

| Sample   | $J_{\text{sc}}$<br>[ $\text{mA cm}^{-2}$ ] | $V_{\text{oc}}$<br>[mV] | $FF$<br>[%] | $\eta$<br>[%] | Thickness <sup>a)</sup><br>[ $\mu\text{m}$ ] |
|----------|--------------------------------------------|-------------------------|-------------|---------------|----------------------------------------------|
| P25/MHAT | 11.2 $\pm$ 0.3                             | 728 $\pm$ 5             | 64 $\pm$ 2  | 5.2 $\pm$ 0.2 | 16 $\pm$ 2                                   |

<sup>a)</sup> Measurement of film thickness was carried out on a surface profile system (Veeco Dektak 150).

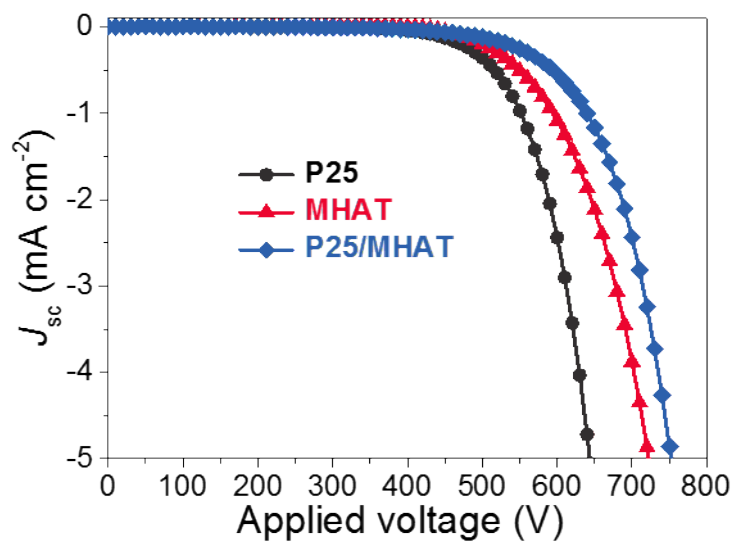

**Figure S4.**  $J$ - $V$  characteristics of P25-, MHAT-, P25/MHAT-based flexible DSCs under dark current.



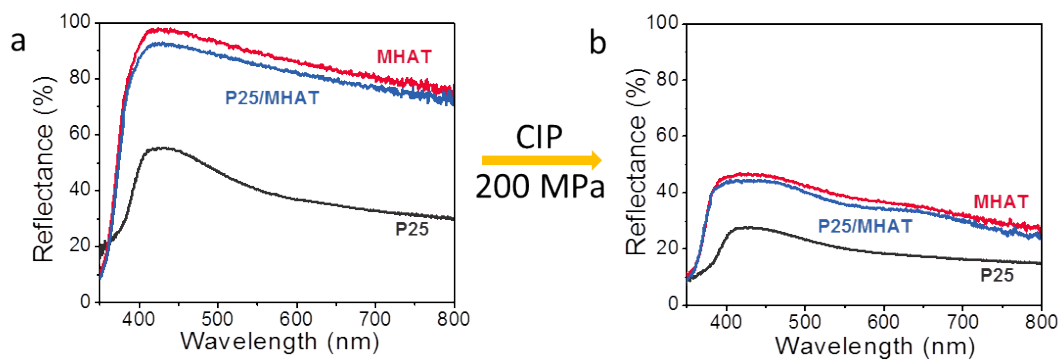

**Figure S5.** Diffuse reflectance spectra of P25, P25/MHAT and MHAT (a) before and (b) after CIP.

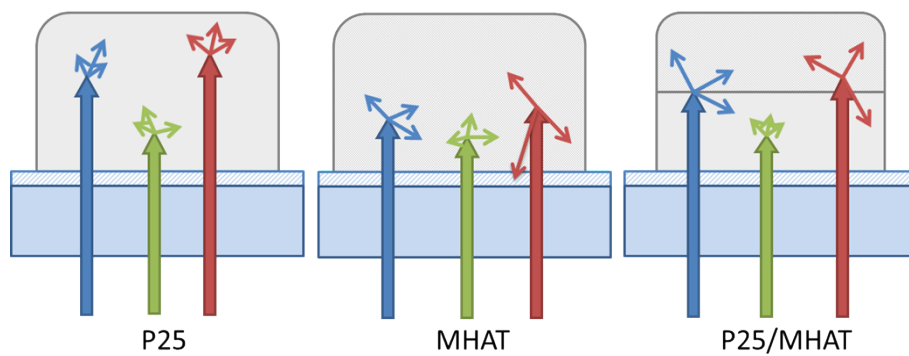

**Figure S6.** Scheme of light scattering in P25, MHAT, and P25/MHAT films.

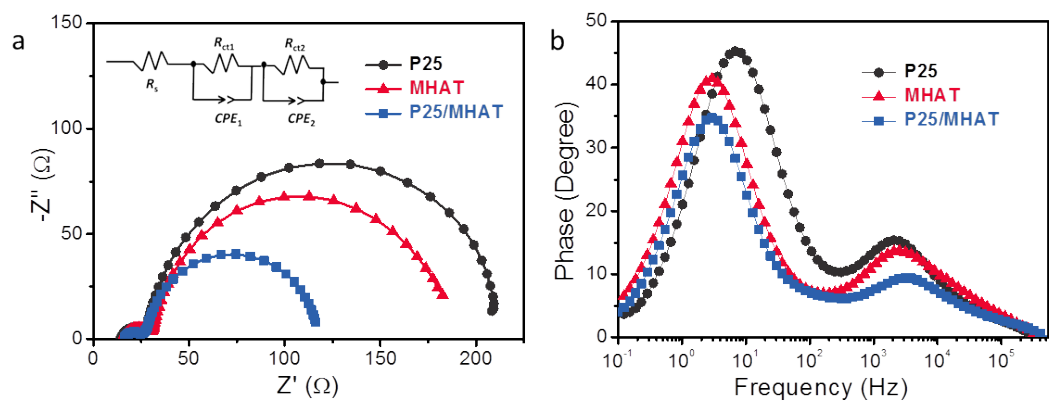

**Figure S7.** (a) Nyquist plots, with the inset showing the equivalent circuit, and (b) Bode phase plots of flexible DSCs based on P25, MHAT, and P25/MHAT.

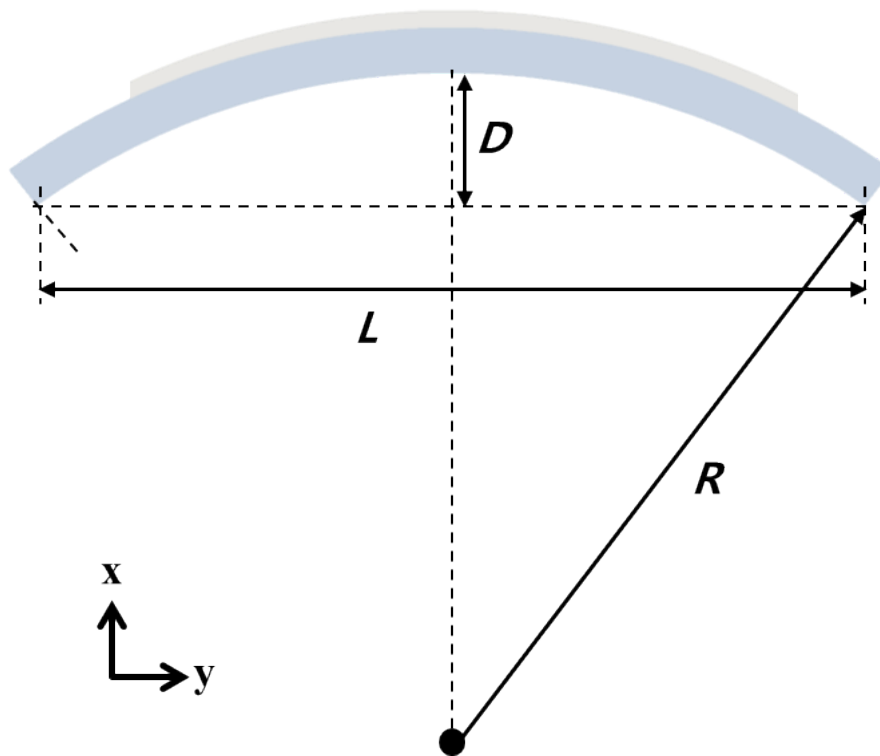

**Figure S8.** Illustration of bending machine,  $R$  can be calculated by the following equation:

$$R = \frac{L^2 + 4D^2}{8D}$$

Where  $L$  and  $D$  can be measured by ruler during test.<sup>[S1]</sup>

[S1] B. J. Kim, D. H. Kim, Y.-Y. Lee, H.-W. Shin, G. S. Han, J. S. Hong, K. Mahmood, T. K. Ahn, Y.-C. Joo, K. S. Hong, N.-G. Park, S. Lee, H. S. Jung, *Energy Environ. Sci.* DOI: 10.1039/c4ee02441a.

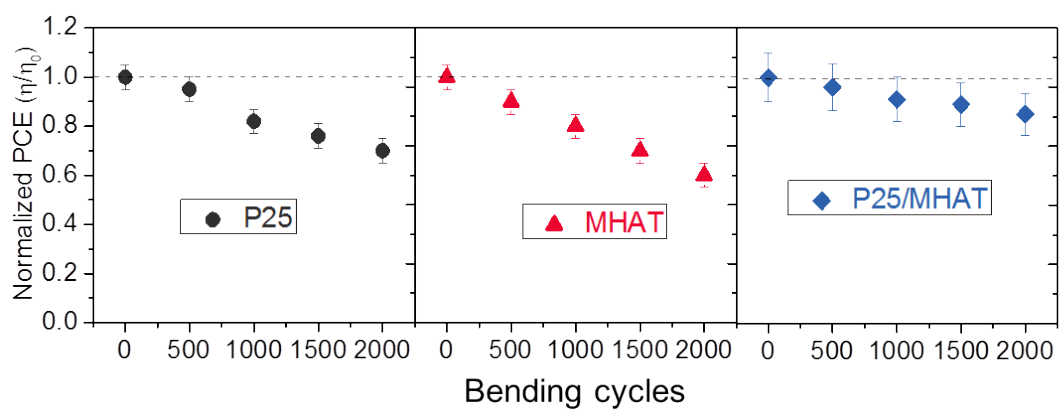

**Figure S9.** Normalized PCE of P25-, MHAT-, and P25/MHAT-based flexible DSCs as a function of bending cycles, with radius of 50 mm.
